# Supplementary material
Source: MDPI journal article supplement (https://www.mdpi.com/2073-4441/14/2/262)
Supplement: s1 [file s1]

## Supplementary Information

### **Enhancing informed decisions for coastal groundwater sustainability: a network analysis of water-related indicator results from 122 cities**

**Khawon Lee<sup>1</sup>, Sun Woo Chang<sup>2</sup>, Stef Koop<sup>3,4</sup>, Kees van Leeuwen<sup>3,4</sup>, and Jeryang Park<sup>1,\*</sup>**

#### **S1. The correlation heatmaps of indicators by the type of cities (All, coastal, and non-coastal)**

We analyzed Spearman's correlation coefficients of three types of cities (i.e. all cities, coastal cities, and non-coastal cities). The range of coefficients are from -1 (red) to +1 (blue). The deepest color is close to  $\pm 1$ . From the far left is node #1 and the number in the cell is node ID. Coastal groundwater is connected to more indicators than all cities and non-coastal cities.

Table S1. The correlation heatmap of entire cities.

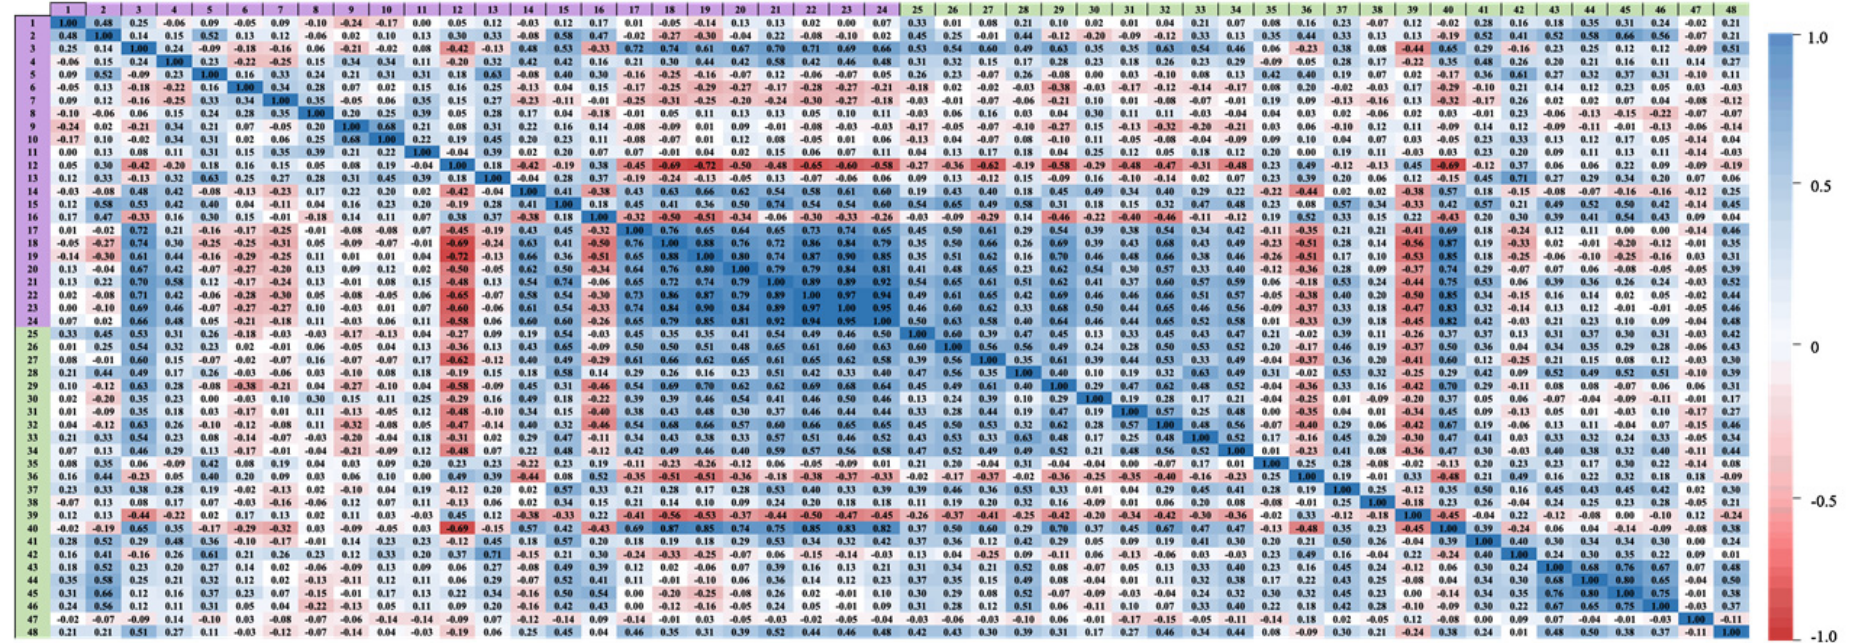

Table S2. The correlation heatmap of coastal cities

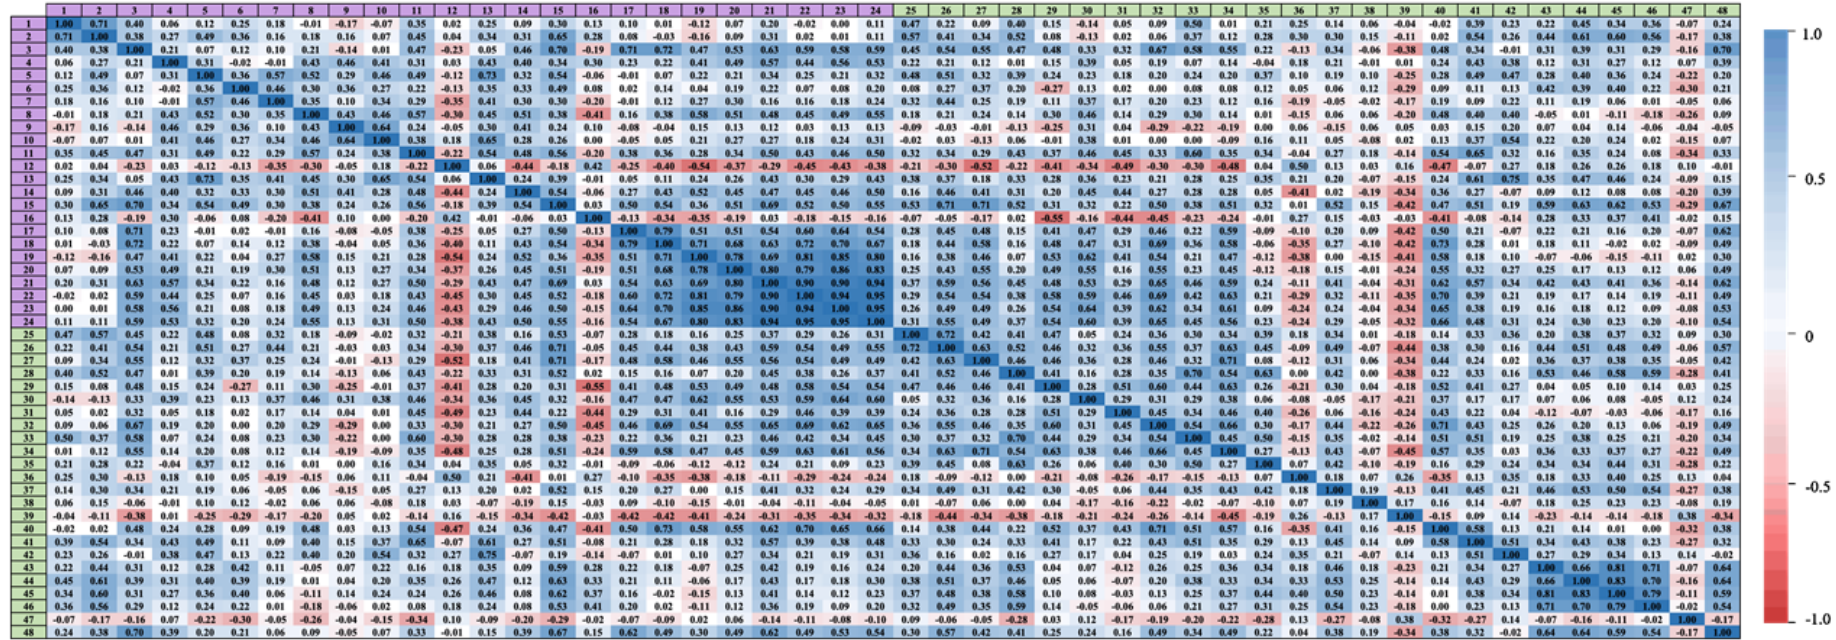



Table S3. The correlation heatmap of non-coastal cities

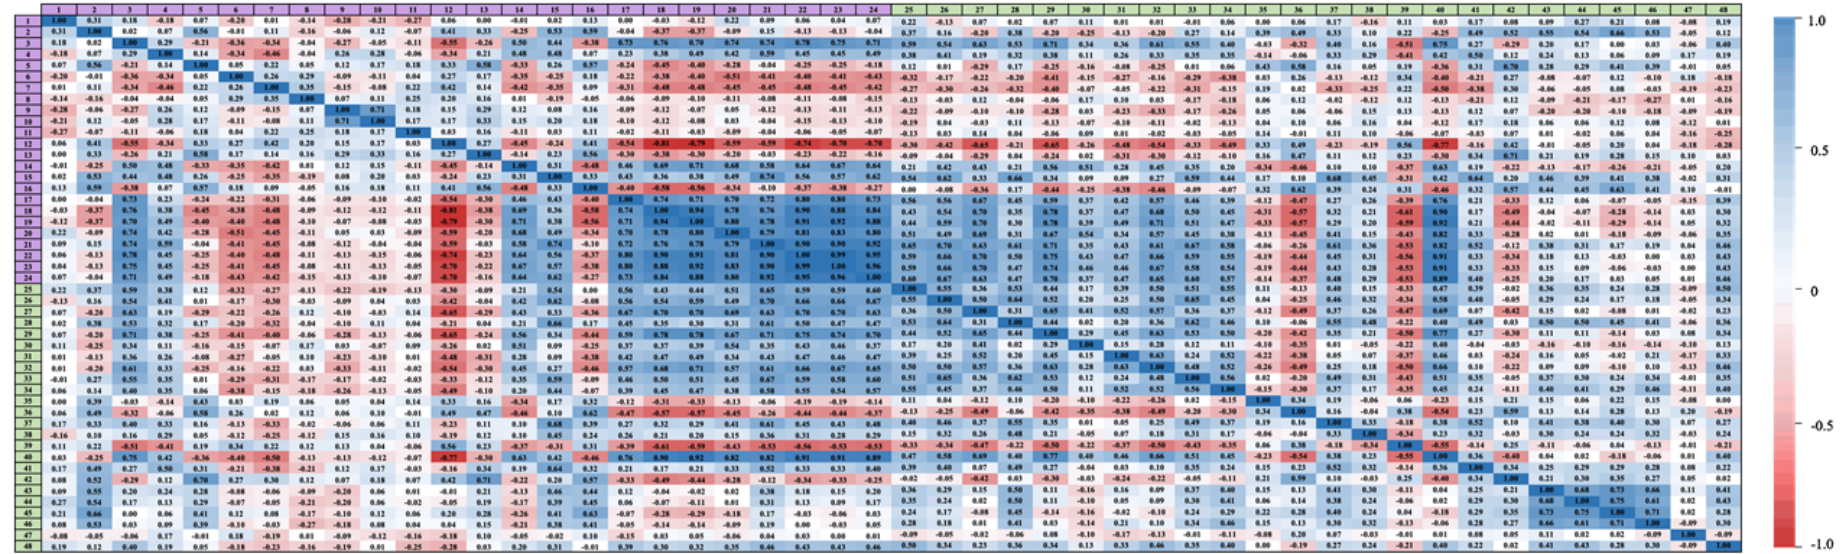

## S2. Network metric values of groundwater-centered networks

Below are the lists of metric values (node strength, closeness, and betweenness) in descending order for all cities (Table S4), coastal cities (Table S5), and non-coastal cities (Table S6). In *Table S4*, node #9 and #10 are only connected each other.

**Table S4.** The results of network metrics of all cities.

| ID | Node strength | ID | Closeness | ID | Betweenness |
|----|---------------|----|-----------|----|-------------|
| 21 | 37.06         | 9  | 0.7000    | 21 | 74.95       |
| 24 | 32.75         | 10 | 0.7000    | 23 | 61.45       |
| 23 | 32.35         | 24 | 0.0227    | 24 | 54.95       |
| 22 | 28.19         | 25 | 0.0223    | 25 | 49.95       |
| 19 | 25.56         | 23 | 0.0222    | 22 | 0.7         |
| 20 | 24.69         | 21 | 0.0213    | 3  | 0           |
| 14 | 17.43         | 22 | 0.0184    | 4  | 0           |
| 30 | 12.00         | 20 | 0.0161    | 9  | 0           |
| 3  | 10.81         | 41 | 0.0159    | 10 | 0           |
| 26 | 10.67         | 15 | 0.0146    | 14 | 0           |
| 27 | 10.00         | 3  | 0.0143    | 15 | 0           |
| 40 | 9.38          | 19 | 0.0143    | 17 | 0           |
| 29 | 9.29          | 29 | 0.0142    | 18 | 0           |
| 32 | 9.29          | 32 | 0.0142    | 19 | 0           |
| 15 | 9.10          | 14 | 0.0137    | 20 | 0           |
| 18 | 9.07          | 28 | 0.0133    | 26 | 0           |
| 17 | 9.05          | 27 | 0.0129    | 27 | 0           |
| 34 | 8.67          | 34 | 0.0128    | 28 | 0           |
| 25 | 8.00          | 17 | 0.0122    | 29 | 0           |
| 33 | 7.67          | 30 | 0.0122    | 30 | 0           |
| 48 | 6.00          | 40 | 0.0118    | 31 | 0           |
| 4  | 5.67          | 26 | 0.0113    | 32 | 0           |
| 28 | 2.00          | 33 | 0.0113    | 33 | 0           |
| 31 | 2.00          | 31 | 0.0112    | 34 | 0           |
| 37 | 2.00          | 4  | 0.0110    | 37 | 0           |
| 41 | 2.00          | 48 | 0.0110    | 40 | 0           |
| 9  | 1.43          | 18 | 0.0105    | 41 | 0           |
| 10 | 1.43          | 37 | 0.0105    | 48 | 0           |

**Table S5.** The results of network metrics of coastal cities.

| <b>ID</b> | <b>Node strength</b> | <b>ID</b> | <b>Closeness</b> | <b>ID</b> | <b>Betweenness</b> |
|-----------|----------------------|-----------|------------------|-----------|--------------------|
| 24        | 38.69                | 21        | 0.0114           | 32        | 146.86             |
| 21        | 38.11                | 24        | 0.0110           | 22        | 87.50              |
| 23        | 34.55                | 23        | 0.0106           | 8         | 79.62              |
| 22        | 32.45                | 22        | 0.0100           | 18        | 73.67              |
| 17        | 29.35                | 11        | 0.0096           | 9         | 61.50              |
| 19        | 28.86                | 20        | 0.0096           | 14        | 57.51              |
| 20        | 28.54                | 19        | 0.0095           | 13        | 33.86              |
| 11        | 28.43                | 15        | 0.0090           | 20        | 32.92              |
| 18        | 25.68                | 8         | 0.0090           | 26        | 30.75              |
| 8         | 21.33                | 41        | 0.0090           | 34        | 26.69              |
| 5         | 21.10                | 18        | 0.0090           | 23        | 21.67              |
| 30        | 18.67                | 40        | 0.0087           | 30        | 17.08              |
| 15        | 16.76                | 26        | 0.0084           | 15        | 11.83              |
| 40        | 16.71                | 17        | 0.0084           | 3         | 8.64               |
| 3         | 15.52                | 3         | 0.0083           | 33        | 5.25               |
| 27        | 15.00                | 30        | 0.0083           | 24        | 2.50               |
| 14        | 14.00                | 5         | 0.0082           | 17        | 2.20               |
| 29        | 13.67                | 32        | 0.0077           | 5         | 1.46               |
| 32        | 13.52                | 14        | 0.0077           | 19        | 1.00               |
| 48        | 13.33                | 13        | 0.0076           | 12        | 0.50               |
| 13        | 12.19                | 34        | 0.0076           | 21        | 0                  |
| 34        | 12.00                | 27        | 0.0075           | 11        | 0                  |
| 26        | 11.33                | 33        | 0.0075           | 41        | 0                  |
| 41        | 10.76                | 4         | 0.0074           | 40        | 0                  |
| 4         | 9.33                 | 48        | 0.0074           | 27        | 0                  |
| 10        | 9.33                 | 29        | 0.0071           | 4         | 0                  |
| 42        | 7.43                 | 31        | 0.0071           | 48        | 0                  |
| 33        | 5.67                 | 10        | 0.0069           | 29        | 0                  |
| 2         | 4.00                 | 42        | 0.0065           | 31        | 0                  |
| 12        | 4.00                 | 2         | 0.0063           | 10        | 0                  |
| 31        | 4.00                 | 12        | 0.0061           | 42        | 0                  |
| 9         | 3.67                 | 9         | 0.0059           | 2         | 0                  |
| 25        | 2.00                 | 7         | 0.0056           | 7         | 0                  |
| 44        | 2.00                 | 25        | 0.0052           | 25        | 0                  |
| 45        | 2.00                 | 44        | 0.0050           | 44        | 0                  |
| 7         | 1.67                 | 45        | 0.0050           | 45        | 0                  |
| 13        | 12.19                | 34        | 0.0076           | 21        | 0                  |

**Table S6.** The results of network metrics of non-coastal cities.

| <b>ID</b> | <b>Node strength</b> | <b>ID</b> | <b>Closeness</b> | <b>ID</b> | <b>Betweenness</b> |
|-----------|----------------------|-----------|------------------|-----------|--------------------|
| 23        | 37.77                | 23        | 0.0210           | 23        | 283.50             |
| 20        | 35.23                | 20        | 0.0182           | 20        | 54.50              |
| 14        | 28.05                | 14        | 0.0150           | 14        | 29                 |
| 30        | 6.00                 | 22        | 0.0143           | 3         | 0                  |
| 12        | 5.10                 | 24        | 0.0143           | 4         | 0                  |
| 3         | 4.68                 | 18        | 0.0139           | 6         | 0                  |
| 17        | 4.68                 | 19        | 0.0139           | 7         | 0                  |
| 29        | 4.52                 | 21        | 0.0138           | 12        | 0                  |
| 21        | 4.03                 | 40        | 0.0138           | 15        | 0                  |
| 40        | 4.03                 | 3         | 0.0130           | 16        | 0                  |
| 4         | 4.00                 | 17        | 0.0130           | 17        | 0                  |
| 7         | 4.00                 | 29        | 0.0125           | 18        | 0                  |
| 36        | 4.00                 | 12        | 0.0123           | 19        | 0                  |
| 22        | 3.92                 | 27        | 0.0121           | 21        | 0                  |
| 24        | 3.92                 | 32        | 0.0120           | 22        | 0                  |
| 18        | 3.79                 | 26        | 0.0119           | 24        | 0                  |
| 19        | 3.79                 | 15        | 0.0111           | 25        | 0                  |
| 15        | 3.67                 | 25        | 0.0111           | 26        | 0                  |
| 25        | 3.67                 | 33        | 0.0111           | 27        | 0                  |
| 33        | 3.67                 | 30        | 0.0105           | 28        | 0                  |
| 26        | 3.43                 | 4         | 0.0102           | 29        | 0                  |
| 32        | 3.10                 | 7         | 0.0102           | 30        | 0                  |
| 27        | 2.86                 | 28        | 0.0098           | 31        | 0                  |
| 6         | 2.00                 | 31        | 0.0098           | 32        | 0                  |
| 16        | 2.00                 | 34        | 0.0098           | 33        | 0                  |
| 28        | 2.00                 | 39        | 0.0098           | 34        | 0                  |
| 31        | 2.00                 | 36        | 0.0095           | 36        | 0                  |
| 34        | 2.00                 | 6         | 0.0092           | 39        | 0                  |
| 39        | 2.00                 | 16        | 0.0083           | 40        | 0                  |
